# NetworkExtinction: an R package to simulate extinction's propagation and rewiring potential in ecological networks

M. Isidora Ávila-Thieme<sup>1,2,3\*x\*</sup>, Derek Corcoran<sup>4,5x\*</sup>, Erik Kusch<sup>4,5x\*</sup>, Simón P. Castillo<sup>6</sup>,  
Fernanda S. Valdovinos<sup>7</sup>, Sergio A. Navarrete<sup>1,3,8,9</sup> and Pablo A. Marquet<sup>1,10,11,12,13</sup>

November 25, 2022

*Running headline:* NetworkExtinction in ecological networks.

<sup>x\*</sup> these authors contributed equally to this manuscript.

\* Corresponding author; M. Isidora Ávila-Thieme e-mail: [isidora.avila.thieme@gmail.com](mailto:isidora.avila.thieme@gmail.com) ; Derek Corcoran e-mail: [derek.corcoran.barrios@gmail.com](mailto:derek.corcoran.barrios@gmail.com)

1. Departamento de Ecología, Facultad de Ciencias Biológicas, Pontificia Universidad Católica de Chile, Santiago, Chile; 2. Advanced Conservation Strategies (ACS), Utah, USA; 3. Instituto Milenio en Socio-Ecología Costera (SECOS), Santiago, Chile; 4. Center for Biodiversity Dynamics in a Changing World (BIOCHANGE), Aarhus University, Aarhus, Denmark 5. Section for Ecoinformatics & Biodiversity, Department of Biology, Aarhus University, Aarhus, Denmark 6. Division of Molecular Pathology and Centre for Cancer and Evolution, The Institute of Cancer Research, London, UK; 7. Department of Environmental Science and Policy, University of California, Davis, USA; 8. Center of Applied Ecology and Sustainability (CAPES), Nucleus for Ecology and Conservation of Temperate Mesophotic Reef Ecosystems (NUTME), Estación Costera de Investigaciones Marinas (ECIM), Pontificia Universidad Católica de Chile, Las Cruces, Chile; 9.

COPAS-COASTAL, Universidad de Concepción, Concepción, Chile; 10. Instituto de Ecología y Biodiversidad de Chile (IEB), Chile; 11. Instituto de Sistemas Complejos de Valparaíso (ICSV), Valparaíso, Chile; 12. Santa Fe Institute, NM, USA; 13. Centro de Cambio Global Universidad Católica, Facultad de Ciencias Biológicas, Pontificia Universidad Católica de Chile, CP 8331150 Santiago, Chile

## Abstract

1  
2 1. Earth's biosphere is currently undergoing drastic reorganisation as a consequence of the sixth  
3 mass extinction brought on by the Anthropocene. Impacts of local and regional extirpation of  
4 species have been demonstrated to propagate through the complex interaction networks they  
5 are part of, subsequently leading to secondary extinctions, exacerbating biodiversity loss.  
6 Contemporary ecological theory has developed several measures to analyse the structure  
7 and robustness of ecological networks under biodiversity loss. However, a toolbox for direct  
8 simulation and quantification of extinction cascades and the creation of novel interactions  
9 (i.e. rewiring) remains absent.

10 2. Here, we present *NetworkExtinction* - a novel R package which we have developed to explore  
11 the propagation of species extinctions sequences through ecological networks as well as  
12 quantify the effects of rewiring potential in response to primary species extinctions. With  
13 *NetworkExtinction* we have integrated ecological theory and computational simulations  
14 to develop functionality with which users may analyze and visualize the structure and  
15 robustness of ecological networks. The core functions introduced with *NetworkExtinction*  
16 focus on simulations of sequential primary extinctions and associated secondary extinctions  
17 while allowing for user-specified secondary extinction thresholds and realisation of rewiring  
18 potential.

19 3. With the package *NetworkExtinction*, users can estimate the robustness of ecological networks  
20 after performing species extinction routines based on several algorithms. Moreover, users  
21 can compare the number of simulated secondary extinctions against a null model of random

22 extinctions. In-built visualizations enable graphing topological indices calculated by the  
23 deletion sequence functions after each simulation step. Finally, the user can define the degree  
24 distribution of the network by fitting different common distributions. Here, we illustrate the  
25 use of the package and its outputs by analyzing a Chilean coastal marine food web.

26 4. *NetworkExtinction* is a compact and easy-to-use R package with which users can quantify  
27 changes in ecological network structure in response to different patterns of species loss,  
28 thresholds, and rewiring potential. Therefore, this package is particularly useful to evaluate  
29 ecosystem responses to anthropogenic and environmental perturbations that produce non-  
30 random species extinctions.

31 *Keywords:* network topology, disturbance, robustness, extinction thresholds, food webs, mutualistic  
32 networks, network science

## Introduction

33

34 Biological systems are commonly represented as complex networks of interactions (i.e., links  
35 between nodes representing species), through which matter and energy flow in a structured way,  
36 as in food webs (Benedek *et al.*, 2007; Pascual & Dunne, 2006; Proulx *et al.*, 2005) and mutualistic  
37 networks (González-Castro *et al.*, 2021; Schleuning *et al.*, 2016; Sebastián-González *et al.*, 2015).  
38 A myriad of perturbations, such as those produced by climate change and/or direct human  
39 activities, could lead in many cases to a local or global extinction of species or to severe reductions  
40 in abundance (Barnosky *et al.*, 2011; Costello *et al.*, 2016; May *et al.*, 1995; Pimm *et al.*, 2019;  
41 Scheffer *et al.*, 2001; Vitousek *et al.*, 1997). Such changes can deeply alter the energy fluxes at  
42 different temporal and spatial scales (Donohue *et al.*, 2016; Radchuk *et al.*, 2019; Venter *et al.*, 2016),  
43 modifying the ecological network components by adding or removing species and interactions,  
44 re-wiring, and changing interaction strengths. These impacts can be propagated through the  
45 ecological network and alter the stability and resilience of the ecosystem (Dunne *et al.*, 2002b).

46 Whether cascading effects are observed or not after removal or addition of a node depends,  
47 to some extent, on the complex structural attributes (also known as topological properties) that  
48 define the network (McWilliams *et al.*, 2019). Since species extinction and / or modification of  
49 their interactions may directly induce the degradation of ecosystem services, affecting human  
50 well-being, anticipating the potential propagation of these effects is of paramount importance  
51 (Barnosky *et al.*, 2011; Dirzo & Raven, 2003). Therefore, the understanding of ecosystem stability  
52 and resilience to different perturbations inducing species extinctions, has received considerable  
53 attention in the literature (Allesina & Pascual, 2009; Ávila-Thieme *et al.*, 2021; Curtsdotter *et al.*,  
54 2011; Dunne *et al.*, 2002a; Hastings *et al.*, 2016; Jordan, 2009; Pimm *et al.*, 2019; Ramos-Jiliberto *et al.*,

55 2012; Roopnarine, 2006; Roopnarine *et al.*, 2007; Valdovinos, 2019; Valdovinos *et al.*, 2009).

## 56 *Topological Properties Shaping the Stability of Ecological Networks*

57 The complexity of ecological networks imposes some challenges in developing an integrated  
58 framework and tools to study these systems. However, some general attributes that charac-  
59 terize most empirically constructed ecological networks do exist. For example, the impact of  
60 the number of species and connectance on ecological network robustness (measured as the  
61 number of secondary extinctions, see box 1 for definitions) have been emphasized by sev-  
62 eral authors but discrepancies still persist. While some studies suggest that increasing the  
63 number of species and connectance among them delay the onset of cascades of secondary ex-  
64 tinctions (Dunne & Williams, 2009; Dunne *et al.*, 2002b; Estrada, 2007; Gilbert, 2009), others show  
65 the opposite relationship (Pires *et al.*, 2015; Sauve *et al.*, 2014; Staniczenko *et al.*, 2010). Thébault  
66 & Fontaine (2010) propose that these discrepancies may be driven by the type of network (e.g.  
67 trophic versus mutualistic networks), which necessitates a different treatment of mutualistic and  
68 trophic networks when studying extinction cascades.

69 Similarly, theoretical models show that the degree distribution (i.e., distribution of links per  
70 node) of ecological networks is strongly associated with their robustness to species loss (Sole &  
71 Montoya, 2001). Usually, degree distributions follow a fat-tailed distribution (Bascompte, 2009;  
72 Dunne *et al.*, 2008). However, power-law degree distributions where super-connected nodes are  
73 more common, are more vulnerable to the removal of the most connected nodes (de Santana *et al.*,  
74 2013; Dunne *et al.*, 2002a; Estrada, 2007; Sole & Montoya, 2001). More generally, a directed attack  
75 to the nodes with higher degree can have larger whole-scale consequences in the network (Albert  
76 & Barabási, 2002; Albert *et al.*, 2000). Identifying the best model to describe an empirical degree

77 distribution has been an active research area and is a common task in the analysis of ecological  
78 networks.

### 79 *The Need for Simulation Approaches in Extinction Analyses*

80 While the assessment of ecosystem robustness through topological metrics of ecological networks  
81 is computationally inexpensive (there are packages that evaluate it easily, see Table S1), relying on  
82 topological metrics alone may be misleading considering the different implications given network  
83 types (Thébault & Fontaine, 2010), and the sometimes weak connection between these metrics  
84 and real (empirical) network resiliency to extinctions (e.g. Ávila-Thieme *et al.* 2021). Alternatively,  
85 assessments of the importance of species on ecological network persistence can be carried out by  
86 simulating a sequence of species removal and evaluating the consequences on network topology  
87 and robustness. Such extinction simulations are computationally much more expensive than the  
88 single-step calculation of topological metrics, but capable of rendering a more direct quantification  
89 of network robustness. Simulating responses to an extinction scenario involves a number of  
90 computationally demanding steps, which can be challenging and time consuming for researchers.  
91 Some node metrics (e.g., node degree) change dynamically throughout the sequential extinction  
92 simulation and need to be recalculated after each simulation iteration.

93 Several indices and open source R packages have been created to visualize and analyze the  
94 topology and dynamics that occur within the networks (Table S1). However, despite the recent  
95 diversification of analytical tools, we still lack a way to assess ecological network robustness  
96 to a 'user-defined' sequence of species loss implemented in an open source platform, such as  
97 R, using approaches that integrate key elements for ecological networks, such as the type of  
98 interactions, extinction thresholds and network rewiring. To fill this software and functionality

99 gap, we have developed an open-source R package that facilitates the exploration of ecological  
100 network (trophic and mutualistic) robustness (see box 1 for definitions) and changes in attributes  
101 following the removal or extinction of nodes in complex ecological networks. Here, we present the  
102 *NetworkExtinction* R package, which quantifies changes in ecological networks both topologically  
103 and returns post-extinction networks according to simulated extinction sequences and their  
104 consequences.

### 105 *Interaction Types, Extinction Thresholds & Network Rewiring*

106 Ecological network types are manifold and may be classified the interaction type they encode (e.g.,  
107 trophic or mutualistic), how many levels of organisms they represent (e.g., bipartite or multilayer  
108 networks), whether they quantify interactions or simply denote their presence/absence (i.e.,  
109 weighted vs. binary networks), and whether they represent realized or potential interactions. To  
110 best represent network changes in response to node removal, co-extinction simulation frameworks  
111 ought to account for the network-type specific changes in network cascade responses.



Box 1: Definitions relevant to the *NetworkExtinction* R package workflows

- **Network Robustness** - A measure of the maintenance of network structure in the face of perturbations and quantified here as the number of species (nodes) lost as a consequence of primary species extinctions.
- **Interaction Type** - a link between two nodes reflecting the type of relationship involved. *NetworkExtinction* handles mutualistic (+/+) and trophic / parasitic (-/+ ) interaction types. For a more exhaustive overview of interaction types, consult Morales-Castilla *et al.* (2015).
- **Interaction strength** - The direct effect that nodes have on each other's demography (Morales-Castilla *et al.*, 2015), fitness (de Santiago-Hernández *et al.*, 2019), or resource acquisition/transfer of energy (Heymans *et al.*, 2016). *NetworkExtinction* implicitly treats interaction strength as the effect that nodes have on each other's persistence.
- **Extinction Threshold** - *NetworkExtinction* treats an extinction threshold as a percentage of interaction strength loss (relative to the total interaction strength at onset of extinction simulation) which a vertex may lose before becoming secondarily extinct (Schleuning *et al.*, 2016).
- **Rewiring capability** - Rewiring is the process by which a vertex may allocate interaction strength linked to a link which is removed due to a loss of interaction partner to an entirely new or already linked partner thereby increasing the interaction strength of new or already existing links in a network (Fründ, 2021; Schleuning *et al.*, 2016; Staniczenko *et al.*, 2010).

113 When considering simulations of extinction cascades, the core use of the *NetworkExtinction*  
114 package, it is thus critical to focus on three important aspects of networks (see box 1 for definitions):  
115 (1) interaction types, (2) interaction strength introducing extinction thresholds, and (3) potential  
116 rewiring of lost interactions enabling continued persistence of species.

117 Interaction Types are the cornerstone of most ecological network research as they greatly impact  
118 how links between nodes are interpreted biologically and subsequently impact the consequences  
119 of loss of connections in extinction cascades. For example, in trophic networks, basal species  
120 may lose all associated predators, resulting in isolated nodes, but not in their extinction. In a  
121 mutualistic network, on the other hand, loss of all connections will inevitably lead to extinction of  
122 any node (given that the network encodes interactions required for survival) (Carpentier *et al.*,  
123 2021; Schleuning *et al.*, 2016).

124 However, a species does not necessarily have to lose all its interaction partners to be in danger  
125 of going extinct (Bascompte & Jordano, 2007). Such extinction thresholds may exist either globally  
126 for all nodes within a network or individually for each node separately. For example, a predator  
127 species may lose all but its main prey species and still continue to thrive, but die out when losing  
128 access to its main prey. In this case, an extinction threshold ought to incorporate interaction  
129 strengths (i.e, link weights in network representation) which will indicate which interaction  
130 partner is most important for the target node.

131 Contrary to the discussion of extinction consequences so far, there is also potential for novel  
132 interactions or changes in established interaction strengths, which may manifest as the rewiring  
133 of networks in response to primary extinctions (Bartley *et al.*, 2019; Ramos-Jiliberto *et al.*, 2012;  
134 Staniczenko *et al.*, 2010; Strona & Bradshaw, 2018; Valdovinos, 2019; Vizentin-Bugoni *et al.*, 2020).  
135 Rewiring potential has recently received increased attention from the ecological network commu-

136 nity as a possible mechanism by which the impacts of the Anthropocene may be abated. At its  
137 core, rewiring of interactions is a process by which links that are lost due to removal of a node  
138 may be reallocated either to novel interaction partners or combined with existing interactions.  
139 Recalling the previous example of a predator losing access to its main prey item, when considering  
140 rewiring potential, this predator may shift to preying on other prey which is already contained in  
141 its diet, or interact with entirely new prey instead of going extinct.

142 Most contemporary analyses of ecological networks and simulations of extinction conse-  
143 quences incorporate one or two of these considerations (interaction type, extinction threshold, and  
144 rewiring), but rarely all three (Schleuning *et al.*, 2016). We suggest that this is a consequence of  
145 the complexity of identifying appropriate thresholds of extinction risks and rewiring potential  
146 that can be realised as well as complexity of analysis tools required to incorporate these mecha-  
147 nisms. To our knowledge, the *NetworkExtinction* package is the first implementation of all these  
148 considerations into one easy- and free-to-use software package.

149

## The *NetworkExtinction* R Package

150 The *NetworkExtinction* package analyzes ecological networks representing species as nodes and  
151 their interactions as links. The links within the networks can be weighted or binary. Using  
152 this input (formatted either as an adjacency matrix or a `network` object), the *NetworkExtinction*  
153 package simulates species extinctions sequences (`SimulateExtinctions` and `RandomExtinctions`  
154 functions). Non-random extinctions can be simulated either as a static ("`Ordered`" method) or  
155 flexible ("`Mostconnected`" method) process. In doing so, the *NetworkExtinction* package interacts  
156 with other R packages, especially with the *network* package (Butts *et al.*, 2008). *NetworkExtinction*  
157 also visualizes the results (`ExtinctionPlot` function) and compares them between the different  
158 methods (`CompareExtinctions` function). Finally, *NetworkExtinction* fits the network degree  
159 distribution (`DegreeDistribution` function). See Figure 1 for a visual representation of this  
160 functionality.

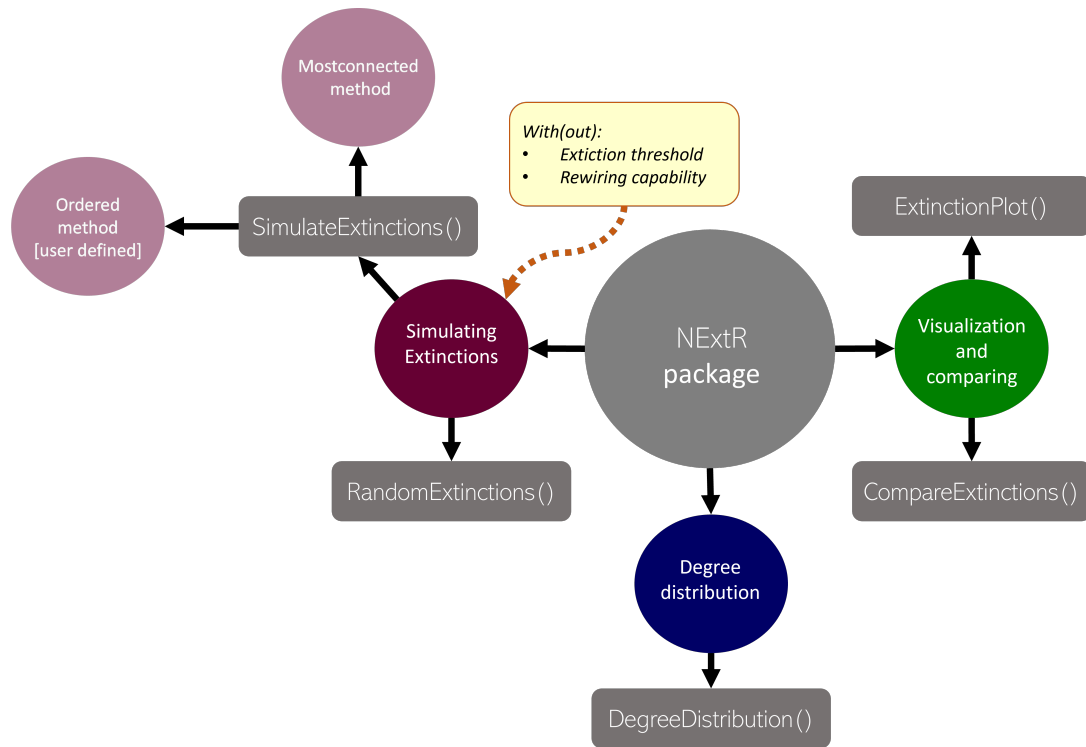

Figure 1: Synthesis and functions of the *NetworkExtinction* package and its functions.

161 When executing a simulation of extinction cascades using the *NetworkExtinction* package, users  
162 can specify (1) what interaction type (i.e., trophic or mutualistic) is being analysed, (2) whether to  
163 consider a species extinction threshold and (3) whether to simulate link rewiring. In the case of  
164 trophic ecological networks, only bottom-up trophic cascades (Berg *et al.*, 2015; Curtsdotter *et al.*,  
165 2011; Dunne *et al.*, 2002b) are modelled (i.e., losing predator species does not affect the survival  
166 of a prey node although it may become disconnected from the network).

167 Here, we demonstrate the functionality and outputs of the *NetworkExtinction* package using  
168 an empirical marine intertidal rocky shore trophic network (hereafter, "chilean\_intertidal"),  
169 which contains 107 species forming 1381 realised trophic interactions (Ávila-Thieme *et al.*, 2021;  
170 Kéfi *et al.*, 2015). For a use-case of mutualistic network analyses with the *NetworkExtinction*

171 package, see Kusch & Ordonez (2022). In the following, we focus on the implementation of a  
172 basic workflow with the *NetworkExtinction* package and how to augment extinction simulations  
173 with consideration of extinction thresholds and rewiring mechanisms. For a detailed overview of  
174 the functions within the R package, their input, and output, please refer to the supplementary  
175 material (section "Package Functions and Arguments").

## 176 *The Basic Workflow*

177 The *NetworkExtinction* package is hosted on CRAN and can be installed and loaded thusly:

```
R> install.packages("NetworkExtinction")  
R> library(NetworkExtinction)
```

### 178 *Extinction Functions*

179 Two of the five functions contained in the *NetworkExtinction* package are used to simulate extinction  
180 cascades and measure ecological network topology and robustness after simulating a given species  
181 deletion sequence corresponding to primary extinctions and identifying secondary extinctions.  
182 These functions are called `SimulateExtinctions` and `RandomExtinctions`.

#### 183 **The `SimulateExtinctions()` Function**

184 `SimulateExtinctions` enables the user to remove nodes from the network based on the  
185 following two deletion sequences: 1) species' degree ("`Mostconnected`" method), 2) a user-defined  
186 order ("`Ordered`" method).

#### 187 *Mostconnected Extinction Order*

188 Using the "`Mostconnected`" method, the `SimulateExtinctions` function first identifies the

189 most connected species via the degree of its corresponding node (i.e., number of links attached to  
190 the node). This node is then removed from the network, and the function checks whether other  
191 species are now going extinct according to user specifications of the function (having become  
192 completely unconnected, in the default case shown here). This step is repeated until the entire  
193 network is unconnected. At each step, `SimulateExtinctions` recalculates node-degree for each  
194 extant species to re-identify the next most connected node up for primary removal (see code  
195 chunk 2 in the supplementary material).

196 The `SimulateExtinctions` function returns two objects: (1) a data frame (`...$sims`) containing  
197 topological metrics of the network after every step of species removal (Table 1) as well as (2)  
198 the reduced network (`...$Network`) corresponding to the portion of the original network extant  
199 after removal of primarily and secondarily extinct species. The "Mostconnected" method of  
200 `SimulateExtinctions` for the Chilean intertidal food web results in complete network annihilation  
201 after primary removal of the 37 most connected species. Consequently, the reduced network is  
202 empty.

Table 1: Summarised results of the *SimulateExtinctions* function with the "Mostconnected" method for the intertidal food web, showing the first and last three rows of the original data frame (see full results in Table S2). Spp: node position of the extinct species, S: richness, L: number of links, C: connectance, Link\_density: link density (L/S), SecExt: secondary extinctions, Pred\_release: predation release, Iso\_nodes: isolated nodes, AccSecExt: cumulative number of secondary extinctions, NumExt: cumulative number of primary extinctions, TotalExt: number of total extinctions. See full results in Table S2 and code to produce this output in code chunk 2 in the supplementary material.

| Spp | S   | L    | C    | Link_density | Modularity | SecExt | Pred_release | Iso_nodes | AccSecExt | NumExt | TotalExt |
|-----|-----|------|------|--------------|------------|--------|--------------|-----------|-----------|--------|----------|
| 15  | 106 | 1314 | 0.12 | 12.40        | 0.009      | 0      | 0            | 0         | 0         | 1      | 1        |
| 13  | 105 | 1252 | 0.11 | 11.92        | 0.013      | 0      | 0            | 0         | 0         | 2      | 2        |
| 4   | 104 | 1192 | 0.11 | 11.46        | 0.014      | 0      | 0            | 0         | 0         | 3      | 3        |
| .   | .   | .    | .    | .            | .          | .      | .            | .         | .         | .      | .        |
| .   | .   | .    | .    | .            | .          | .      | .            | .         | .         | .      | .        |
| .   | .   | .    | .    | .            | .          | .      | .            | .         | .         | .      | .        |
| 67  | 57  | 10   | 0.00 | 0.18         | 0.395      | 8      | 41           | 47        | 23        | 35     | 58       |
| 107 | 48  | 1    | 0.00 | 0.02         | 0          | 1      | 46           | 46        | 24        | 36     | 60       |
| 33  | 46  | 0    | 0.00 | 0.00         | 0          | 1      | 45           | 46        | 25        | 37     | 62       |

203 *User-Defined Extinction Order*

204 Supplying a user-defined order to *SimulateExtinctions* is particularly useful when knowl-  
 205 edge about extinction risks of species exists or is inferred from species' traits (e.g. size, trophic



206 position). In contrast to the "Mostconnected" method of the `SimulateExtinctions` function, the  
207 "Ordered" method does not change the initial extinction order, but treats it as static. Here, we  
208 supply the 60 most connected species who aren't top predators in the Chilean intertidal network  
209 (see code chunk 3 in the supplementary material and Table S3 for the full extinction sequence).

210 Regardless of the selected method, the `SimulateExtinctions` function returns the same kind  
211 of output previously described. However, having supplied a primary extinction order that does  
212 not include all nodes in the original network and whose extinction simulation did not lead to total  
213 network annihilation, we can also assess the post-extinction simulation network (Figure 2).

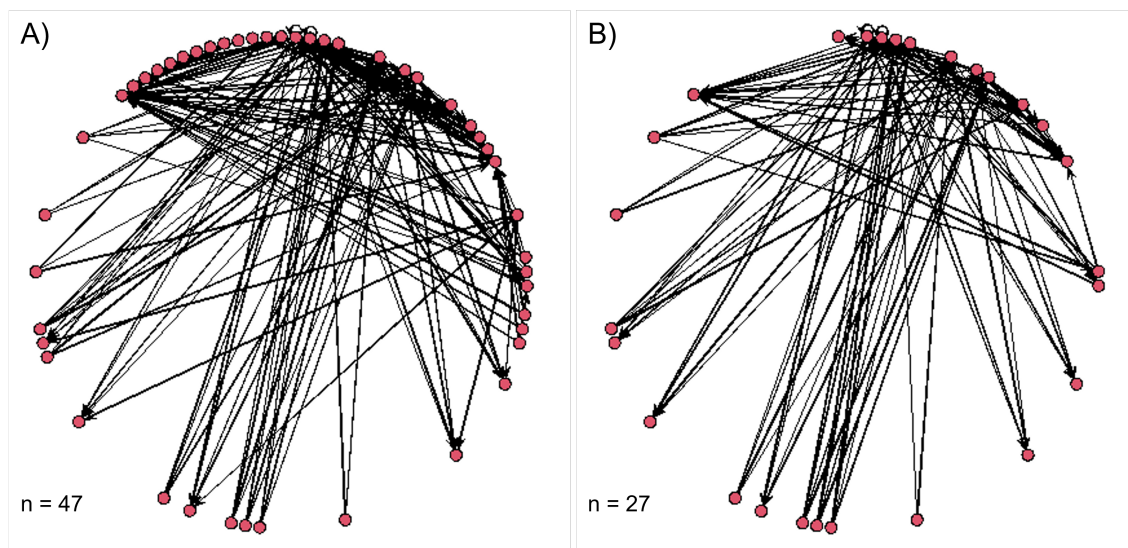

Figure 2: Post-extinction networks representative of removal of the 60 most connected non-top predator species from the Chilean intertidal network. A) Reduced network following removal of only primary extinction nodes. B) Reduced network obtained via the `SimulateExtinctions` function which also accounts for secondary extinctions. n = number of resulting nodes. See code chunk 4 in the supplementary material for generation of these networks and plots.

214      **Random Extinctions**

215      The second extinction simulation function - `RandomExtinctions` - allows users to simulate the  
216 removal of a number of nodes based on a random deletion sequence. The output of this function  
217 is particularly useful for establishing effect sizes of non-random deletion sequences (see code  
218 chunk 5 in the supplementary material).

219      The function returns a data frame (Table 2) and a plot (when the optional `plot` argument is set  
220 to `TRUE` (see code arguments in supplementary material) with the mean of secondary extinctions  
221 for each removal step averaged through all the simulations.

Table 2: Summarised results of the *RandomExtinction* function for the intertidal food web, showing the first and last three rows. NumExt: cumulative number of primary extinctions, AccSecExt\_95CI: cumulative 95% of confidence intervals of the secondary extinctions among all the simulations performed, AccSecExt\_mean: cumulative average of secondary extinctions among all the simulations performed, Upper & Lower: lower and upper limit of the [mean + 95% CI], respectively. See the full results in Table S4 and the code to produce this output in code chunk 5 in the supplementary material.

| NumExt | AccSecExt_95CI | AccSecExt_mean | Upper | Lower |
|--------|----------------|----------------|-------|-------|
| 1      | 0              | 0              | 0     | 0     |
| 2      | 0              | 0              | 0     | 0     |
| 3      | 4.14           | 0.3            | 4.44  | 0     |
| .      | .              | .              | .     | .     |
| .      | .              | .              | .     | .     |
| .      | .              | .              | .     | .     |
| 104    | 9.59           | 9.32           | 18.9  | 0     |
| 105    | 10.15          | 9.46           | 19.61 | 0     |
| 106    | 9.59           | 10.18          | 19.78 | 0.59  |

## 222 *Analysis & Visualization Functions*

223 Two more functions contained in the *NetworkExtinction* package are used to visualize and analyze  
224 ecological networks and their extinction sequences beyond simulations of extinction cascades.  
225 These are called `ExtinctionPlot` and `CompareExtinctions`.

### 226 **The `ExtinctionPlot()` Function**

227 The `ExtinctionPlot` function is particularly useful for visualizations of extinction simulation  
228 outcomes as obtained through `SimulateExtinctions`. Using this function, users can plot any  
229 of the topological metrics that `SimulateExtinctions` calculates at each simulation step against  
230 the progress of the extinction simulation along the extinction order (see code chunk 6 in the  
231 supplementary material). As such, this function can visualize all columns displayed in the  
232 standard `SimulateExtinctions` output (Table 1). As an example, we plot the link density of the  
233 intertidal food web at each removal step using the "Mostconnected" deletion sequence of the  
234 `SimulateExtinctions` function (Figure 3).

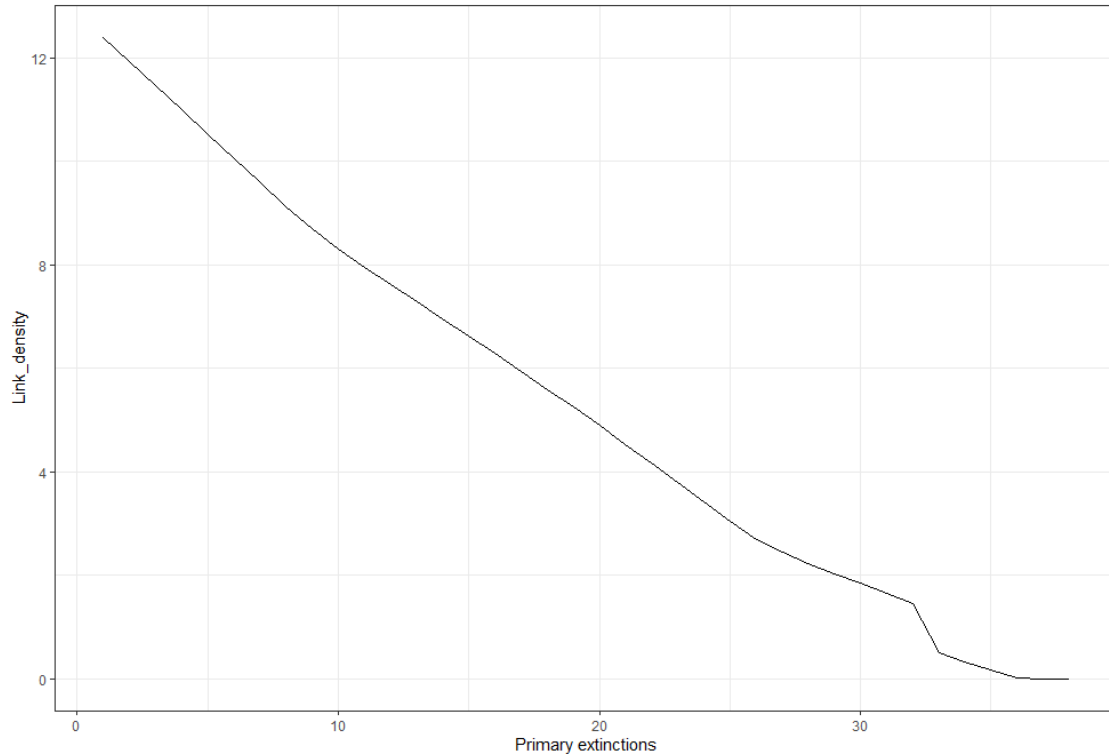

Figure 3: Links density after each removal step (primary extinctions) in the intertidal food web using the "Mostconnected" method of the *SimulateExtinctions* function and visualized using the *ExtinctionPlot* function.

### 235 **The CompareExtinctions() Function**

236 The *CompareExtinctions* function compares the number of secondary extinctions produced by  
237 either of the two options of the *SimulateExtinctions* function, against a set of random deletion  
238 sequences (see code chunk 6 in the supplementary material). This comparison is returned as a  
239 figure (Figure 4). Here, we compare the secondary extinctions produced by the random deletion  
240 sequences (*RandomExtinctions*) with the extinctions produced by the "Mostconnected" deletion  
241 sequence of the *SimulateExtinctions* function. In this example, Figure 4 shows clearly that  
242 primary extinction of the most connected species has a more drastic effect on the rate of secondary

243 extinction accumulation than would be expected following random primary extinctions.

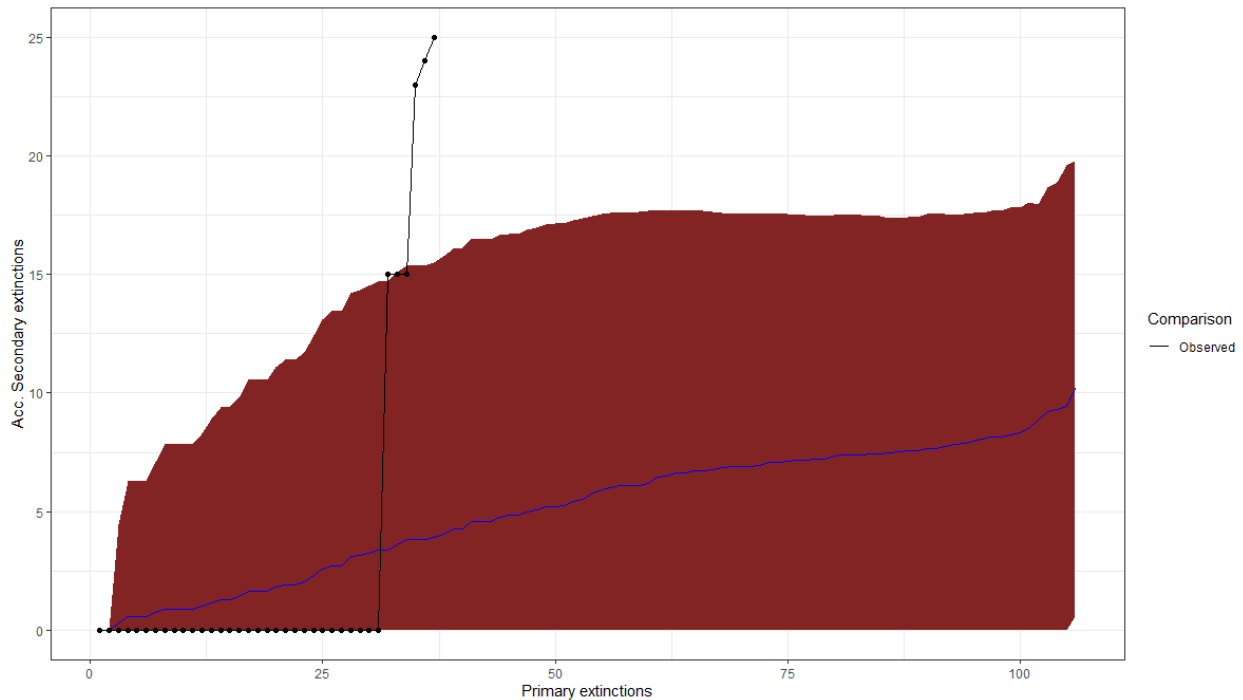

Figure 4: Comparison of the cumulative secondary extinctions after each removal step (Primary extinctions, defined by user) between the random (Null hypothesis) and "Mostconnected" (Observed) deletion sequence in the intertidal food web using the *CompareExtinctions* function. The blue line is the average ( $\pm 95\%CI$  [red area]) of secondary extinctions of the null model and the black line following the dots represents the secondary extinctions of the observed model.

#### 244 *Degree Distribution*

245 The final function contained in the *NetworkExtinction* package - *DegreeDistribution* - fits the  
246 degree distribution of the network using two approaches: linear (on log-transformed data) and  
247 non-linear regression (see code chunk 7 in the supplementary material).

248 Different statistical approaches have been proposed to fit the degree distribution, such as

249 maximum likelihood (Clauset *et al.*, 2009), ordinary least squares, or linear versus non-linear  
 250 regression (Xiao *et al.*, 2011). As in other fields, the use of linear and non-linear regressions  
 251 has been controversial (Xiao *et al.*, 2011). Some have suggested that the linearization using a  
 252 logarithmic scale is flawed and that instead, the analysis should be conducted on the original scale  
 253 using non-linear regression methods (Xiao *et al.*, 2011). In part, this is because when using linear  
 254 regressions (LR) on log-transformed data the error distribution may not meet the assumptions  
 255 needed to statistically compare across different models; hence, a second group of approaches  
 256 considers the use of non-linear regression using general least squares, in combination with  
 257 Akaike’s information criteria to select the best model that fits the degree distribution.

258 DegreeDistribution incorporates these considerations in its three data frames outputs  
 259 (models, params, and DDvalues) with:

- 260 • models: Comparison of the AIC and normal distribution of the residual assumption test  
 261 between the different distributions tested (Table 3).

Table 3: Model parameters and normal distribution tests.

| logLik | AIC     | BIC     | model    | Normal.Resid | family      |
|--------|---------|---------|----------|--------------|-------------|
| 83.15  | -160.30 | -153.64 | Exp      | No           | Exponential |
| 13.39  | -20.77  | -14.20  | Power    | No           | PowerLaw    |
| -27.48 | 60.96   | 67.53   | LogExp   | No           | Exponential |
| -80.84 | 167.68  | 174.25  | Logpower | No           | PowerLaw    |

- 262 • params: The statistical parameters of each model (Table 4) corresponding to  $P_{(k)} = ck^{\beta}$   
 263 (non-linear power-law models),  $\log P_{(k)} = \beta \log k + c$  (linear power-law models) and  $P_{(k)} =$

264  $e^{\lambda k+c}$  (non-linear exponential distribution models),  $\log P_{(k)} = \lambda k + c$  (linear exponential  
 265 distribution models).

Table 4: Statistical parameters of the models.

| term   | estimate | std.error | statistic | p.value | model    |
|--------|----------|-----------|-----------|---------|----------|
| c      | 2.25     | 0.38      | 5.84      | 0       | LogPower |
| Beta   | -1.20    | 0.11      | -10.44    | 0       | LogPower |
| Beta   | -0.45    | 0.04      | -11.17    | 0       | Power    |
| c      | 1.54     | 0.15      | 10.27     | 0       | Power    |
| c      | 0.67     | 0.09      | 7.25      | 0       | LogExp   |
| Lambda | -0.07    | 0.00      | -28.41    | 0       | LogExp   |
| Lambda | -0.04    | 0.00      | -26.98    | 0       | Exp      |
| c      | 0.16     | 0.03      | 6.63      | 0       | Exp      |

266 • DDvalues: The degree distribution with the observed values and the value of each fitted  
 267 model (visualised automatically by the function as seen in Figure 5).

268 In our example, the best model is the exponential degree distribution obtained from non-linear  
 269 regressions (NLR) with an AIC = -160.30 (see Table 3). If we calculate the difference between  
 270 the AIC value obtained from NLR (Exp model) with the AIC value obtained from LR (LogExp)  
 271 (-160.30 - 60.96 = -221.26), it is  $< -2$ , which means that we proceed with the results obtained from  
 272 NLR. Thus, the intertidal food web follows an exponential degree distribution (Figure 5).



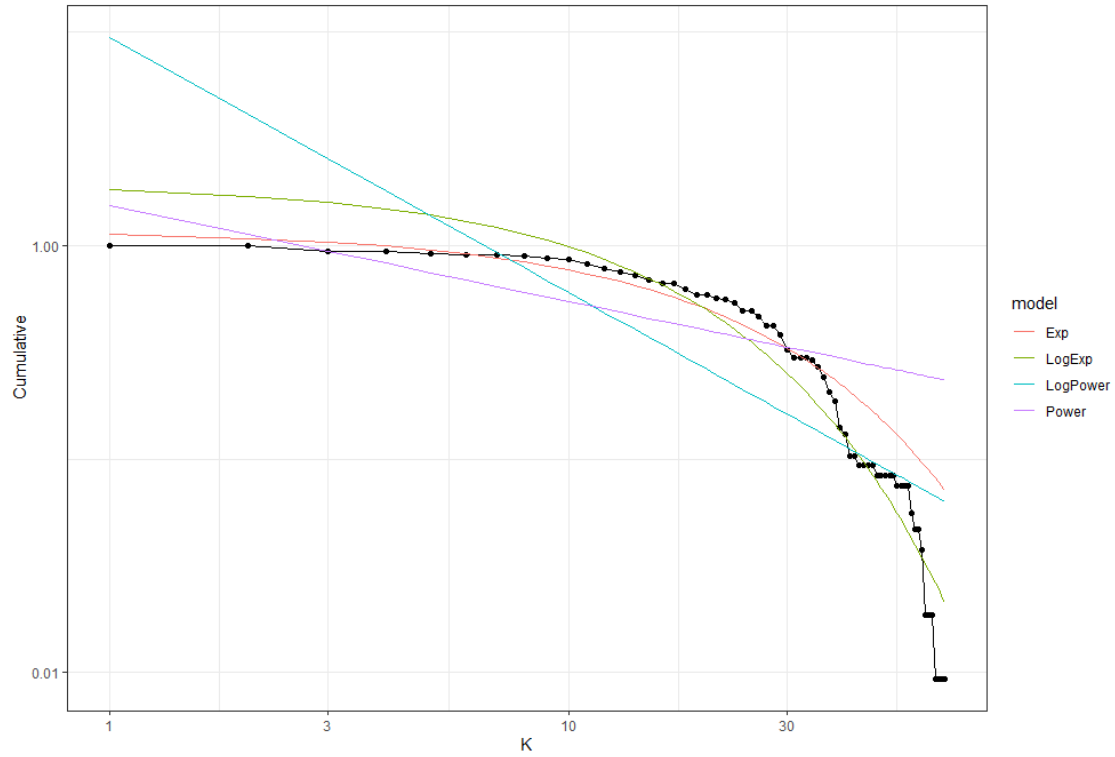

Figure 5: Cumulative probability distribution for a given degree ( $k$ ) using the DegreeDistribution function. The plot shows two different model fits (lines). Note that since the fitted lines are regression models, their predicted values can sometimes start in values over one. Dots are the observed values

## 273 *Extinction Thresholds - Using Weighted Networks*

274 Biological interactions may be expressed either as present or absent, or quantified via a host of  
275 measures such as interaction frequency (González-Castro *et al.*, 2021), diet composition proportion  
276 (Cuff *et al.*, 2021), or handling time of food items (Sentis *et al.*, 2021), among others. Such  
277 weighted interactions are used to create weighted ecological networks and establish a spectrum of  
278 importance of interaction partners for each node. For example, the loss of a prey comprising 70%  
279 of a predator diet constitutes a much greater risk to its own continued existence than the loss of a  
280 prey item accounting for only 5%.

281 Using the argument `IS` (short for "interaction strength") in the `SimulateExtinctions` and  
282 `RandomExtinctions` functions, users may define what proportion of original interaction strength  
283 each node is required to retain before being considered secondarily extinct. The default value  
284 is 0, denoting that a node has to become fully unconnected from the network to be consid-  
285 ered secondarily extinct. The `IS` argument may be used to either set a global extinction  
286 threshold or index local extinction thresholds for each individual node. Here, we demonstrate  
287 the extinction threshold argument with a global threshold of 0.5 - each node goes secondarily  
288 extinct when it loses more than 50% of its original interaction strength. To do so, we use the  
289 "`chilean_weighted`" data object supplied with the *NetworkExtinction* package (see code chunk 8  
290 in the supplementary material). Figure 6 shows clearly how much more drastic the accumulation  
291 of secondary extinctions turns out when accounting for extinction thresholds particularly when  
292 compared to Figure 4.

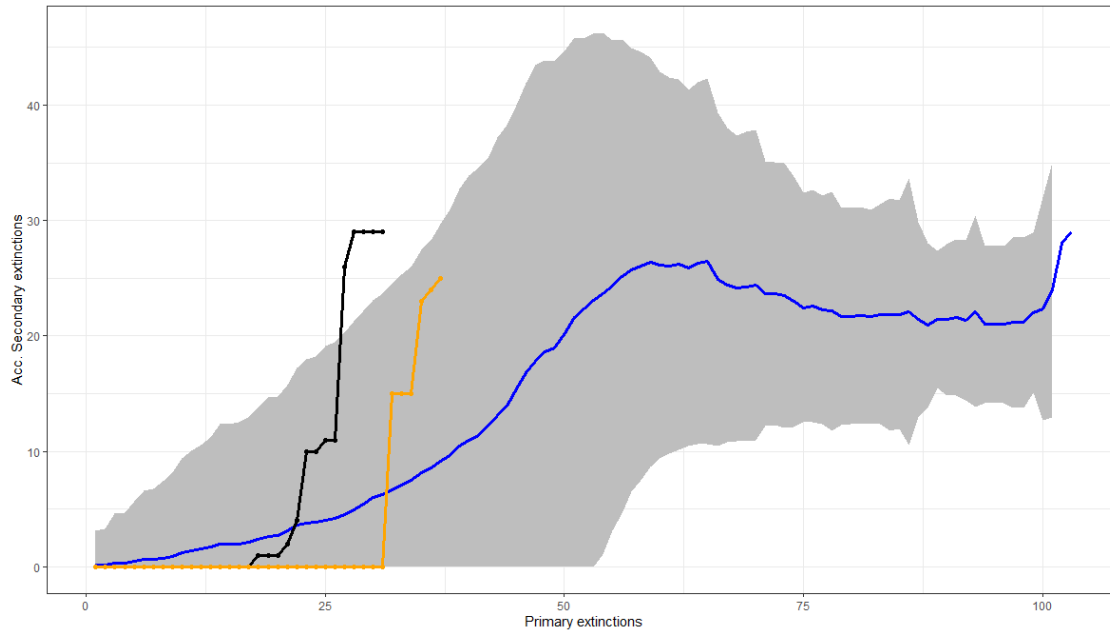

Figure 6: Comparison of the cumulative secondary extinctions after each removal step (Primary extinctions) between the random (Null hypothesis) and "Mostconnected" (Observed) deletion sequence in the weighted intertidal food web assuming an extinction threshold of 0.5. The blue line is the average ( $\pm 95\%CI$  [grey area]) of secondary extinctions of the null model and the black line following the dots represents the secondary extinctions of the observed model. The orange line represents the observed model assuming an extinction threshold of 0 (Figure 4).

293 To highlight the relevance of the chosen extinction threshold to the output obtained by the *Net-*  
294 *workExtinction* package, we have run the `SimulateExtinctions` function with the "Mostconnected"  
295 method for all possible values of IS between its minimum of 0 and maximum of 1 in steps of 0.01.  
296 We extracted the primary removal step at which the entire network had become unconnected/fully  
297 extinct and visualise the results in Figure 7 which shows the drastically increased rate of secondary  
298 extinctions as IS approaches 1.

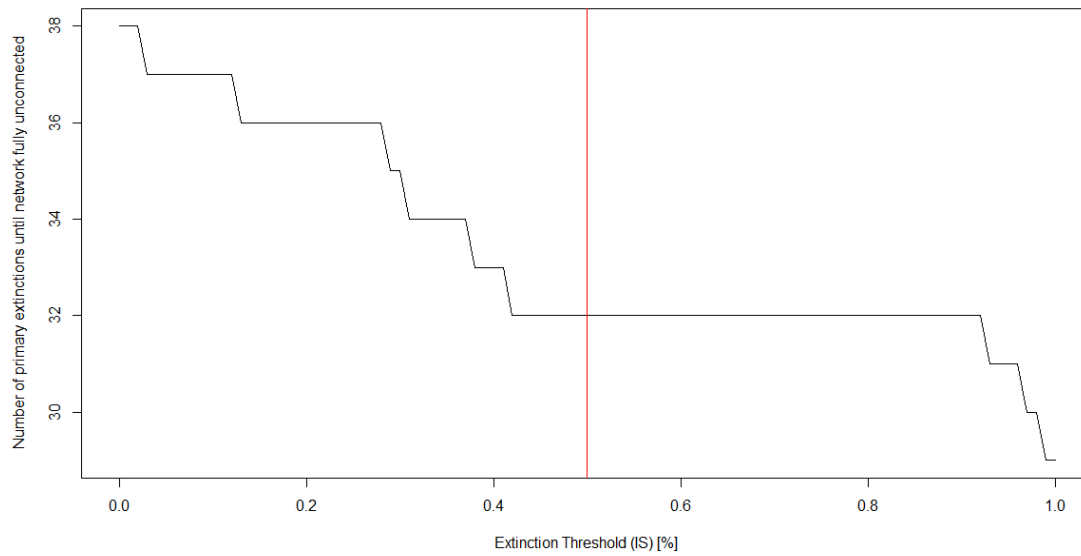

Figure 7: Network robustness (network of primary extinctions required to produce total disconnection of the network ) over the the value space of the extinction threshold parameter. The red line indicates the extinction simulation depicted in Figure 6. See code chunk 9 in the supplementary material for this computation.

## 299 *Realising Rewiring Potential - Escape From Cascades*

300 So far, we have demonstrated the use of the *NetworkExtinction* package under the assumption  
301 of static links. However, this assumption rarely holds in nature, where networks have been  
302 demonstrated to be capable of rewiring to new or pre-existing partners (Bartley *et al.*, 2019;  
303 Schleuning *et al.*, 2016). We have implemented functionality to account for rewiring potential in  
304 the *NetworkExtinction* package through three optional arguments to the `SimulateExtinctions`  
305 and `RandomExtinctions` functions. These are:

- 306 • `RewiringDist` - this must be a matrix of the same dimensions as the adjacency matrix  
307 defining the `Network` argument and contain either species-(dis)similarities or rewiring  
308 probabilities.
- 309 • `Rewiring` - this argument must be a function that calculates rewiring probabilities from the  
310 species-(dis)similarities stored in the `RewiringDist` object. This argument can be defined  
311 much like the `IS` argument either globally or separately for each species.
- 312 • `RewiringProb` - this global threshold determines what level of rewiring probability must be  
313 exceeded for rewiring potential to be realised.

314 Following a primary extinction, the *NetworkExtinction* package identifies all links which are  
315 being lost due to the removal of the primary extinction node. Then it identifies all the nodes  
316 involved in these interactions that still remain in the network. Calculating rewiring probability  
317 from `RewiringDist` matrix using the `Rewiring` function, the *NetworkExtinction* package then  
318 identifies which potential rewiring options are realised by evaluating the computed rewiring  
319 probabilities against the `RewiringProb` threshold. Any of the previously identified links for whom

320 a realization of rewiring potential has been identified are then transferred to the new interaction  
321 partner. If there exists a pre-existing link between these two, the rewired link's weight is addedd  
322 to the pre-existing link's weight.

323 Here, we demonstrate the use of the *NetworkExtinction* package with already identified  
324 rewiring probabilities thus specifying a `Rewiring` argument which simply passes the values stored  
325 in `RewiringDist` along to the evaluation against the `RewiringProb` argument. To identify potential  
326 links (i.e., rewiring potential), we assigned each species into functional groups and subsequently  
327 assume that a predator preying on any item of a specific functional group may also predate each  
328 other member of the same functional group. This results in a binary matrix of potential trophic  
329 interactions in the Chilean intertidal ecosystem. This data is available via the *NetworkExtinction*  
330 package as the `chilean_potential` object. See code chunk 10 in the supplementary material for  
331 the computation. As Figure 8 indicates, accounting for rewiring potential of ecological networks  
332 leads to higher network robustness and longer runs of primary extinction simulations until full  
333 network annihilation is reached. Additionally, Figure 8 highlights that realisation of rewiring  
334 potential may lead to concentration of links on a small subset of species which incur a large  
335 number of secondary extinctions when they are removed.

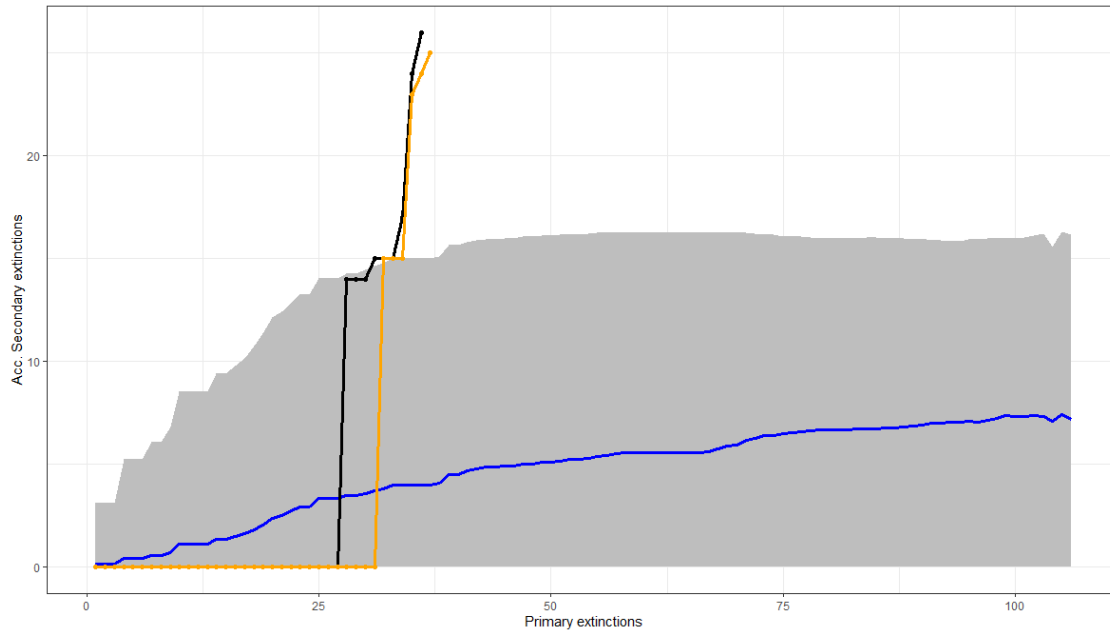

Figure 8: Comparison of the cumulative secondary extinctions after each removal step (Primary extinctions) between the random (Null hypothesis) and “*Mostconnected*” (Observed) deletion sequence in the intertidal food web assuming rewiring as indicated in the main text. The blue line is the average ( $\pm 95\%CI$  [grey area]) of secondary extinctions of the null model and the black line following the dots represents the secondary extinctions of the observed model. The orange line represents the observed model assuming no realisation of rewiring potential (Figure 4).

336 We realize that the implementation of the rewiring capabilities may be overly simplistic for  
337 some purposes as interactions may not be rewired wholesale, but only incrementally and split  
338 among multiple partners rather than just one rewiring partner. Nevertheless, we suggest that the  
339 capability to analyse realisation of rewiring potential in the first place represents a step-change  
340 improvement for the field of ecological network analysis and subsequent considerations of more  
341 nuanced rewiring processes may be implemented in the *NetworkExtinction* package due to its  
342 open-source nature.

343

## Concluding remarks

344 With the *NetworkExtinction* package, we have developed an easy-to-use package to visualize and  
345 assess the structure and robustness of the ecological network to different sequences of loss of  
346 species. The package lowers drastically the barrier of entry into extinction consequence forecasting  
347 models for a wide user-basis and we expect it's applicability will be wide-ranging given the  
348 ubiquity of ecological networks.

349

## Acknowledgments

350 M.I.A. acknowledges funding from ANID-PIA/Basal FB0002, Walton Family Foundation, and  
351 to Fondecyt 3220110. P.M. acknowledges funding from Instituto de Ecología y Biodiversidad,  
352 IEB Chile (AFB-17008), FONDECYT 1200925, and ACE210010 and FB210005, BASAL funds for  
353 centers of excellence from ANID-Chile to Centro de Modelamiento Matemático (CMM). F.S.V  
354 acknowledges funding from US National Science Foundation (NSF) grants DEB-2129757 and  
355 DEB-2224915.

356

## Author's contributions

357 M.I.A. D.C. and P.M. conceived the study. M.I.A., D.C., and E.K. wrote the code. S.A.N. provided  
358 the data for the intertidal food web. F.S.V. provided conceptual and technical support. M.I.A.,  
359 D.C. and S.P.C. wrote the first draft of the manuscript. E.K. made substantial revisions to the  
360 manuscript and produced the final draft. All authors contributed to the final version of the paper.



361

## Data and code availability

362 The code for the R package can be found in the project repository ([github.com/derek-corcoran-](https://github.com/derek-corcoran-barrios/NetworkExtinction)  
363 [barrios/NetworkExtinction](https://github.com/derek-corcoran-barrios/NetworkExtinction)).

## Literature Cited

364

365 Albert, R. & Barabási, A.L. (2002) Statistical mechanics of complex networks. *Reviews of modern*  
366 *physics*, **74**, 47.

367 Albert, R., Jeong, H. & Barabási, A.L. (2000) Error and attack tolerance of complex networks.  
368 *nature*, **406**, 378.

369 Allesina, S. & Pascual, M. (2009) Googling food webs: can an eigenvector measure species'  
370 importance for coextinctions? *PLoS computational biology*, **5**, e1000494.

371 Ávila-Thieme, M.I., Corcoran, D., Pérez-Matus, A., Wieters, E.A., Navarrete, S.A., Marquet, P.A. &  
372 Valdovinos, F.S. (2021) Alteration of coastal productivity and artisanal fisheries interact to affect  
373 a marine food web. *Scientific reports*, **11**, 1–14.

374 Barnosky, A.D., Matzke, N., Tomiya, S., Wogan, G.O., Swartz, B., Quental, T.B., Marshall, C.,  
375 McGuire, J.L., Lindsey, E.L., Maguire, K.C. *et al.* (2011) Has the earth's sixth mass extinction  
376 already arrived? *Nature*, **471**, 51.

377 Bartley, T.J., McCann, K.S., Bieg, C., Cazelles, K., Granados, M., Guzzo, M.M., MacDougall, A.S.,  
378 Tunney, T.D. & McMeans, B.C. (2019) Food web rewiring in a changing world. *Nature ecology &*  
379 *evolution*, **3**, 345–354.

380 Bascompte, J. (2009) Disentangling the web of life. *Science*, **325**, 416–419.

381 Bascompte, J. & Jordano, P. (2007) Plant-Animal Mutualistic Networks: The Architec-  
382 ture of Biodiversity. *Annual Review of Ecology, Evolution, and Systematics*, **38**, 567–593.

383 <https://dx.doi.org/10.1146/annurev.ecolsys.38.091206.095818>.

- 384 Benedek, Z., Jordán, F. & Báldi, A. (2007) Topological keystone species complexes in ecological  
385 interaction networks. *Community Ecology*, **8**, 1–7.
- 386 Berg, S., Pimenov, A., Palmer, C., Emmerson, M. & Jonsson, T. (2015) Ecological communities are  
387 vulnerable to realistic extinction sequences. *Oikos*, **124**, 486–496.
- 388 Butts, C.T. *et al.* (2008) network: a package for managing relational data in r. *Journal of Statistical*  
389 *Software*, **24**, 1–36.
- 390 Carpentier, C., Barabás, G., Spaak, J.W. & De Laender, F. (2021) Reinterpreting the relationship  
391 between number of species and number of links connects community structure and stability.  
392 *Nature Ecology Evolution*. <https://dx.doi.org/10.1038/s41559-021-01468-2>.
- 393 Clauset, A., Shalizi, C.R. & Newman, M.E. (2009) Power-law distributions in empirical data. *SIAM*  
394 *review*, **51**, 661–703.
- 395 Costello, C., Ovando, D., Clavelle, T., Strauss, C.K., Hilborn, R., Melnychuk, M.C., Branch, T.A.,  
396 Gaines, S.D., Szuwalski, C.S., Cabral, R.B. *et al.* (2016) Global fishery prospects under contrasting  
397 management regimes. *Proceedings of the national academy of sciences*, **113**, 5125–5129.
- 398 Cuff, J.P., Windsor, F.M., Tercel, M.P., Kitson, J.J. & Evans, D.M. (2021) Overcoming the pitfalls  
399 of merging dietary metabarcoding into ecological networks. *Methods in Ecology and Evolution*.  
400 <https://dx.doi.org/10.1111/2041-210X.13796>.
- 401 Curtsdotter, A., Binzer, A., Brose, U., de Castro, F., Ebenman, B., Eklöf, A., Riede, J.O., Thierry,  
402 A. & Rall, B.C. (2011) Robustness to secondary extinctions: comparing trait-based sequential  
403 deletions in static and dynamic food webs. *Basic and Applied Ecology*, **12**, 571–580.

- 404 de Santana, C.N., Rozenfeld, A.F., Marquet, P.A. & Duarte, C.M. (2013) Topological properties of  
405 polar food webs. *Marine ecology progress series*, **474**, 15–26.
- 406 de Santiago-Hernández, M.H., Martín-Rodríguez, S., Lopezaraiza-Mikel, M., Oyama, K.,  
407 González-Rodríguez, A. & Quesada, M. (2019) The role of pollination effectiveness on  
408 the attributes of interaction networks: from floral visitation to plant fitness. *Ecology*, **100**.  
409 <https://dx.doi.org/10.1002/ecy.2803>.
- 410 Dirzo, R. & Raven, P.H. (2003) Global state of biodiversity and loss. *Annual review of Environment  
411 and Resources*, **28**.
- 412 Donohue, I., Hillebrand, H., Montoya, J.M., Petchey, O.L., Pimm, S.L., Fowler, M.S., Healy, K.,  
413 Jackson, A.L., Lurgi, M., McClean, D. *et al.* (2016) Navigating the complexity of ecological  
414 stability. *Ecology Letters*, **19**, 1172–1185.
- 415 Dunne, J.A. & Williams, R.J. (2009) Cascading extinctions and community collapse in model food  
416 webs. *Philosophical Transactions of the Royal Society B: Biological Sciences*, **364**, 1711–1723.
- 417 Dunne, J.A., Williams, R.J. & Martinez, N.D. (2002a) Food-web structure and network theory: the  
418 role of connectance and size. *Proceedings of the National Academy of Sciences*, **99**, 12917–12922.
- 419 Dunne, J.A., Williams, R.J. & Martinez, N.D. (2002b) Network structure and biodiversity loss in  
420 food webs: robustness increases with connectance. *Ecology letters*, **5**, 558–567.
- 421 Dunne, J.A., Williams, R.J., Martinez, N.D., Wood, R.A. & Erwin, D.H. (2008) Compilation and  
422 network analyses of cambrian food webs. *PLoS biology*, **6**, e102.
- 423 Estrada, E. (2007) Food webs robustness to biodiversity loss: the roles of connectance, expansibility  
424 and degree distribution. *Journal of theoretical biology*, **244**, 296–307.

- 425 Fründ, J. (2021) Dissimilarity of species interaction networks: how to partition rewiring and  
426 species turnover components. *Ecosphere*, **12**. <https://dx.doi.org/10.1002/ecs2.3653>.
- 427 Gilbert, A.J. (2009) Connectance indicates the robustness of food webs when subjected to species  
428 loss. *Ecological Indicators*, **9**, 72–80.
- 429 González-Castro, A., Morán-López, T., Nogales, M. & Traveset, A. (2021) Changes in the structure  
430 of seed dispersal networks when including interaction outcomes from both plant and animal  
431 perspectives. *Oikos*, p. oik.08315. <https://dx.doi.org/10.1111/oik.08315>.
- 432 Hastings, A., McCann, K.S. & de Ruiter, P.C. (2016) Introduction to the special issue: theory of  
433 food webs. *Theoretical Ecology*, **9**, 1–2.
- 434 Heymans, J.J., Coll, M., Link, J.S., Mackinson, S., Steenbeek, J., Walters, C. & Christensen, V.  
435 (2016) Best practice in Ecopath with Ecosim food-web models for ecosystem-based management.  
436 *Ecological Modelling*, **331**, 173–184. <https://dx.doi.org/10.1016/j.ecolmodel.2015.12.007>.
- 437 Jordan, F. (2009) Keystone species and food webs. *Philosophical Transactions of the Royal Society B:*  
438 *Biological Sciences*, **364**, 1733–1741.
- 439 Kéfi, S., Berlow, E.L., Wieters, E.A., Joppa, L.N., Wood, S.A., Brose, U. & Navarrete, S.A. (2015)  
440 Network structure beyond food webs: mapping non-trophic and trophic interactions on chilean  
441 rocky shores. *Ecology*, **96**, 291–303.
- 442 Kusch, E. & Ordonez, A. (2022) Ecological network resilience & extinction proxies - updating  
443 projections of ecological network topology scenarios. *Manuscript in Preparation*.
- 444 May, R.M., Lawton, J.H. & Stork, N.E. (1995) Assessing extinction rates. *Extinction rates*, **1**, 13–14.

- 445 McWilliams, C., Lurgi, M., Montoya, J.M., Sauve, A. & Montoya, D. (2019) The stabil-  
446 ity of multitrophic communities under habitat loss. *Nature Communications*, **10**, 1–11.  
447 <https://dx.doi.org/10.1038/s41467-019-10370-2>.
- 448 Morales-Castilla, I., Matias, M.G., Gravel, D. & Araújo, M.B. (2015) Inferring  
449 biotic interactions from proxies. *Trends in Ecology & Evolution*, **30**, 347–356.  
450 <https://dx.doi.org/10.1016/j.tree.2015.03.014>.
- 451 Pascual, M. & Dunne, J.A. (2006) *Ecological networks: linking structure to dynamics in food webs*.  
452 Oxford University Press.
- 453 Pimm, S.L., Donohue, I., Montoya, J.M. & Loreau, M. (2019) Measuring resilience is essential to  
454 understand it. *Nature Sustainability*, **2**, 895–897.
- 455 Pires, M.M., Koch, P.L., Farina, R.A., de Aguiar, M.A., dos Reis, S.F. & Guimarães Jr, P.R. (2015)  
456 Pleistocene megafaunal interaction networks became more vulnerable after human arrival.  
457 *Proceedings of the Royal Society B: Biological Sciences*, **282**, 20151367.
- 458 Proulx, S.R., Promislow, D.E. & Phillips, P.C. (2005) Network thinking in ecology and evolution.  
459 *Trends in ecology & evolution*, **20**, 345–353.
- 460 Radchuk, V., Laender, F.D., Cabral, J.S., Boulangeat, I., Crawford, M., Bohn, F., Raedt, J.D.,  
461 Scherer, C., Svenning, J.C., Thonicke, K. *et al.* (2019) The dimensionality of stability depends on  
462 disturbance type. *Ecology letters*, **22**, 674–684.
- 463 Ramos-Jiliberto, R., Valdovinos, F.S., de Espanés, P.M. & Flores, J.D. (2012) Topological plasticity  
464 increases robustness of mutualistic networks. *Journal of Animal Ecology*, **81**, 896–904.

- 465 Roopnarine, P.D. (2006) Extinction cascades and catastrophe in ancient food webs. *Paleobiology*, **32**,  
466 1–19.
- 467 Roopnarine, P.D., Angielczyk, K.D., Wang, S.C. & Hertog, R. (2007) Trophic network models  
468 explain instability of early triassic terrestrial communities. *Proceedings of the Royal Society B:*  
469 *Biological Sciences*, **274**, 2077–2086.
- 470 Sauve, A.M., Fontaine, C. & Thébault, E. (2014) Structure–stability relationships in networks  
471 combining mutualistic and antagonistic interactions. *Oikos*, **123**, 378–384.
- 472 Scheffer, M., Carpenter, S., Foley, J.A., Folke, C. & Walker, B. (2001) Catastrophic shifts in  
473 ecosystems. *Nature*, **413**, 591.
- 474 Schleuning, M., Fründ, J., Schweiger, O., Welk, E., Albrecht, J., Albrecht, M., Beil, M., Benadi,  
475 G., Blüthgen, N., Bruelheide, H., Böhning-Gaese, K., Dehling, D.M., Dormann, C.F., Exeler, N.,  
476 Farwig, N., Harpke, A., Hickler, T., Kratochwil, A., Kuhlmann, M., Kühn, I., Michez, D., Mudri-  
477 Stojni, S., Plein, M., Rasmont, P., Schwabe, A., Settele, J., Vujić, A., Weiner, C.N., Wiemers, M. &  
478 Hof, C. (2016) Ecological networks are more sensitive to plant than to animal extinction under  
479 climate change. *Nature Communications*, **7**, 1–9. <https://dx.doi.org/10.1038/ncomms13965>.
- 480 Sebastián-González, E., Dalsgaard, B., Sandel, B. & Guimarães, P.R. (2015) Macroecological trends  
481 in nestedness and modularity of seed-dispersal networks: Human impact matters. *Global Ecology*  
482 *and Biogeography*, **24**, 293–303. <https://dx.doi.org/10.1111/geb.12270>.
- 483 Sentis, A., Montoya, J.M. & Lurgi, M. (2021) Warming indirectly increases invasion  
484 success in food webs. *Proceedings of the Royal Society B: Biological Sciences*, **288**.  
485 <https://dx.doi.org/10.1098/rspb.2020.2622>.

- 486 Sole, R.V. & Montoya, M. (2001) Complexity and fragility in ecological networks. *Proceedings of the*  
487 *Royal Society of London B: Biological Sciences*, **268**, 2039–2045.
- 488 Staniczenko, P.P., Lewis, O.T., Jones, N.S. & Reed-Tsochas, F. (2010) Structural dynamics and  
489 robustness of food webs. *Ecology letters*, **13**, 891–899.
- 490 Strona, G. & Bradshaw, C.J. (2018) Co-extinctions annihilate planetary life during extreme environ-  
491 mental change. *Scientific reports*, **8**, 1–12.
- 492 Thébault, E. & Fontaine, C. (2010) Stability of ecological communities and the architecture of mutu-  
493 alistic and trophic networks. *Science*, **329**, 853–856. <https://dx.doi.org/10.1126/science.1188321>.
- 494 Valdovinos, F.S. (2019) Mutualistic networks: moving closer to a predictive theory. *Ecology letters*,  
495 **22**, 1517–1534.
- 496 Valdovinos, F.S., Ramos-Jiliberto, R., Flores, J.D., Espinoza, C. & López, G. (2009) Structure and  
497 dynamics of pollination networks: the role of alien plants. *Oikos*, **118**, 1190–1200.
- 498 Venter, O., Sanderson, E.W., Magrath, A., Allan, J.R., Beher, J., Jones, K.R., Possingham, H.P.,  
499 Laurance, W.F., Wood, P., Fekete, B.M. *et al.* (2016) Sixteen years of change in the global terrestrial  
500 human footprint and implications for biodiversity conservation. *Nature Communications*, **7**, 12558.
- 501 Vitousek, P.M., Mooney, H.A., Lubchenco, J. & Melillo, J.M. (1997) Human domination of earth's  
502 ecosystems. *Science*, **277**, 494–499.
- 503 Vizentin-Bugoni, J., Debastiani, V.J., Bastazini, V.A., Maruyama, P.K. & Sperry, J.H. (2020) Including  
504 rewiring in the estimation of the robustness of mutualistic networks. *Methods in Ecology and*  
505 *Evolution*, **11**, 106–116.



506 Xiao, X., White, E.P., Hooten, M.B. & Durham, S.L. (2011) On the use of log-transformation vs.  
507 nonlinear regression for analyzing biological power laws. *Ecology*, **92**, 1887–1894.
